# Supplementary material for: A Proactive Environmental Approach for Preventing Legionellosis in Infants: Water Sampling and Antibiotic Resistance Monitoring, a 3-Years Survey Program
Source: MDPI journal article supplement (doi:10.3390/healthcare7010039), 2019-03-08
Supplement: s1 [file s1]

## Supplementary Material

# A Proactive Environmental Approach for Preventing Legionellosis in Infants: Water Sampling and Antibiotic Resistance Monitoring, a 3-Years Survey Program

Ioanna Alexandropoulou, Theodoros Parasidis, Theocharis Konstantinidis, Maria Panopoulou and Theodoros C. Constantinidis

*Table 1.* Water samples in each sampling round, remedial actions taken in the event of contamination and Legionella pneumophila isolates in NCIU.

| Samples                                  | Sampling round | Year | Clinic | Sample site             | Cold / Hot water | <i>L. pneumophila</i><br>(cfu/L) | <i>L. pneumophila</i><br>serogroup |
|------------------------------------------|----------------|------|--------|-------------------------|------------------|----------------------------------|------------------------------------|
| S1                                       | 1st            | 2007 | NCIU   | sink tap                | hot              | 0                                | 0                                  |
| S2                                       | 1st            | 2007 | NCIU   | sink tap                | hot              | 0                                | 0                                  |
| S3                                       | 1st            | 2007 | NCIU   | sink tap                | hot              | 0                                | 0                                  |
| S4                                       | 1st            | 2007 | NCIU   | sink tap                | hot              | 0                                | 0                                  |
| S5                                       | 2nd            | 2007 | NCIU   | sink tap                | hot              | 1.600                            | 1                                  |
| S6                                       | 2nd            | 2007 | NCIU   | sink tap                | hot              | 1.000                            | 1                                  |
| S7                                       | 2nd            | 2007 | NCIU   | sink tap                | hot              | 1.400                            | 1                                  |
| Remedial action: thermal shock treatment |                |      |        |                         |                  |                                  |                                    |
| S8                                       | 3rd            | 2008 | NCIU   | sink tap                | hot              | 0                                | 0                                  |
| S9                                       | 3rd            | 2008 | NCIU   | sink tap                | hot              | 0                                | 0                                  |
| S10                                      | 3rd            | 2008 | NCIU   | sink tap                | hot              | 0                                | 0                                  |
| S11                                      | 4th            | 2008 | NCIU   | sink tap                | cold             | 0                                | 0                                  |
| S12                                      | 4th            | 2008 | NCIU   | sink tap                | hot              | 0                                | 0                                  |
| S13                                      | 5th            | 2009 | NCIU   | sink tap                | cold             | 120                              | 1                                  |
| S14                                      | 5th            | 2009 | NCIU   | sink tap                | hot              | 100                              | 1                                  |
| Installation of filters in one sink tap  |                |      |        |                         |                  |                                  |                                    |
| S15                                      | 5th            | 2009 | NCIU   | sink tap with<br>filter | cold             | 0                                | 0                                  |

|                                                 |     |      |      |                      |      |        |   |
|-------------------------------------------------|-----|------|------|----------------------|------|--------|---|
| S16                                             | 5th | 2009 | NCIU | sink tap with filter | hot  | 0      | 0 |
| S17                                             | 6th | 2009 | NCIU | sink tap             | hot  | 0      | 0 |
| S18                                             | 6th | 2009 | NCIU | sink tap             | cold | 0      | 0 |
| S19                                             | 7th | 2010 | NCIU | sink tap with filter | hot  | 0      | 0 |
| S20                                             | 7th | 2010 | NCIU | sink tap             | hot  | 0      | 0 |
| S21                                             | 7th | 2010 | NCIU | sink tap with filter | hot  | 0      | 0 |
| S22                                             | 7th | 2010 | NCIU | sink tap             | hot  | 2.000  | 1 |
| S23                                             | 7th | 2010 | NCIU | sink tap             | hot  | 21.500 | 1 |
| <b>Remedial action: thermal shock treatment</b> |     |      |      |                      |      |        |   |
| S24                                             | 8th | 2010 | NCIU | sink tap             | hot  | 1000   | 1 |
| S25                                             | 8th | 2010 | NCIU | sink tap             | cold | 0      | 0 |
| S26                                             | 8th | 2010 | NCIU | sink tap with filter | hot  | 0      | 0 |
| S27                                             | 8th | 2010 | NCIU | sink tap with filter | cold | 0      | 0 |
| S28                                             | 8th | 2010 | NCIU | sink tap with filter | hot  | 0      | 0 |
| S29                                             | 8th | 2010 | NCIU | sink tap             | hot  | 0      | 0 |
| <b>Remedial action: thermal shock treatment</b> |     |      |      |                      |      |        |   |

Table 2. Water samples in each sampling round, remedial actions taken in the event of contamination and Legionella pneumophila isolates in Obstetrics clinic II.

| Samples                                                            | Sampling round | Year | Clinic                  | Sample site | Cold / Hot water | <i>L. pneumophila</i><br>(cfu/L) | <i>L. pneumophila</i><br>serogroup |
|--------------------------------------------------------------------|----------------|------|-------------------------|-------------|------------------|----------------------------------|------------------------------------|
| S44                                                                | 1st            | 2008 | Obstetrics clinic<br>II | sink tap    | cold             | 1.040                            | 2-15                               |
| S45                                                                | 1st            | 2008 | Obstetrics clinic<br>II | sink tap    | hot              | 1.200                            | 2-15                               |
| <b>Remedial action: thermal shock treatment/ hyperchlorination</b> |                |      |                         |             |                  |                                  |                                    |
| S46                                                                | 2nd            | 2008 | Obstetrics clinic<br>II | sink tap    | cold             | 0                                | 0                                  |
| S47                                                                | 2nd            | 2008 | Obstetrics clinic<br>II | sink tap    | hot              | 0                                | 0                                  |
| S48                                                                | 2nd            | 2008 | Obstetrics clinic<br>II | sink tap    | cold             | 0                                | 0                                  |
| S49                                                                | 2nd            | 2008 | Obstetrics clinic<br>II | sink tap    | hot              | 0                                | 0                                  |
| S50                                                                | 3rd            | 2009 | Obstetrics clinic<br>II | sink tap    | cold             | 0                                | 0                                  |
| S51                                                                | 3rd            | 2009 | Obstetrics clinic<br>II | sink tap    | hot              | 0                                | 0                                  |
| S52                                                                | 3rd            | 2009 | Obstetrics clinic<br>II | sink tap    | cold             | 0                                | 0                                  |
| S53                                                                | 3rd            | 2009 | Obstetrics clinic<br>II | sink tap    | hot              | 0                                | 0                                  |
| S54                                                                | 4th            | 2009 | Obstetrics clinic<br>II | sink tap    | cold             | 28.000                           | 2-15                               |
| S55                                                                | 4th            | 2009 | Obstetrics clinic<br>II | sink tap    | hot              | 38.000                           | 2-15                               |
| <b>Remedial action: thermal shock treatment/ hyperchlorination</b> |                |      |                         |             |                  |                                  |                                    |
| S56                                                                | 5th            | 2010 | Obstetrics clinic<br>II | sink tap    | hot              | 23.500                           | 2-15                               |

**Table 3.** Water samples in each sampling round, remedial actions taken in the event of contamination and *Legionella pneumophila* isolates in Obstetrics clinic III.

| Samples                                         | Sampling round | Year | Clinic                | Sample site | Cold / Hot water | <i>L. pneumophila</i> (cfu/L) | <i>L. pneumophila</i> serogroup |
|-------------------------------------------------|----------------|------|-----------------------|-------------|------------------|-------------------------------|---------------------------------|
| S30                                             | 1st            | 2008 | Obstetrics clinic III | sink tap    | cold             | 0                             | 0                               |
| S31                                             | 1st            | 2008 | Obstetrics clinic III | sink tap    | hot              | 8.000                         | 2-15                            |
| <b>Remedial action: thermal shock treatment</b> |                |      |                       |             |                  |                               |                                 |
| S32                                             | 2nd            | 2008 | Obstetrics clinic III | sink tap    | hot              | 2.000                         | 2-15                            |
| S33                                             | 2nd            | 2008 | Obstetrics clinic III | sink tap    | hot              | 0                             | 0                               |
| <b>Remedial action: thermal shock treatment</b> |                |      |                       |             |                  |                               |                                 |
| S35                                             | 3rd            | 2009 | Obstetrics clinic III | sink tap    | hot              | 5.600                         | 2-15                            |
| S36                                             | 3rd            | 2009 | Obstetrics clinic III | sink tap    | cold             | 0                             | 0                               |
| S37                                             | 3rd            | 2009 | Obstetrics clinic III | sink tap    | hot              | 320                           | 2-15                            |
| <b>Remedial action: thermal shock treatment</b> |                |      |                       |             |                  |                               |                                 |
| S38                                             | 4th            | 2009 | Obstetrics clinic III | sink tap    | cold             | 0                             | 0                               |
| S39                                             | 4th            | 2009 | Obstetrics clinic III | sink tap    | hot              | 31.500                        | 2-15                            |
| <b>Remedial action: thermal shock treatment</b> |                |      |                       |             |                  |                               |                                 |
| S40                                             | 5th            | 2010 | Obstetrics clinic III | sink tap    | cold             | 0                             | 0                               |
| S41                                             | 5th            | 2010 | Obstetrics clinic III | sink tap    | hot              | 0                             | 0                               |
| S42                                             | 6th            | 2010 | Obstetrics clinic III | sink tap    | hot              | 51.800                        | 2-15                            |
| S43                                             | 6th            | 2010 | Obstetrics clinic III | sink tap    | cold             | 0                             | 0                               |
| <b>Remedial action: thermal shock treatment</b> |                |      |                       |             |                  |                               |                                 |
